# Supplementary material
Source: PubMed Central journal article supplement (PMC2758813)

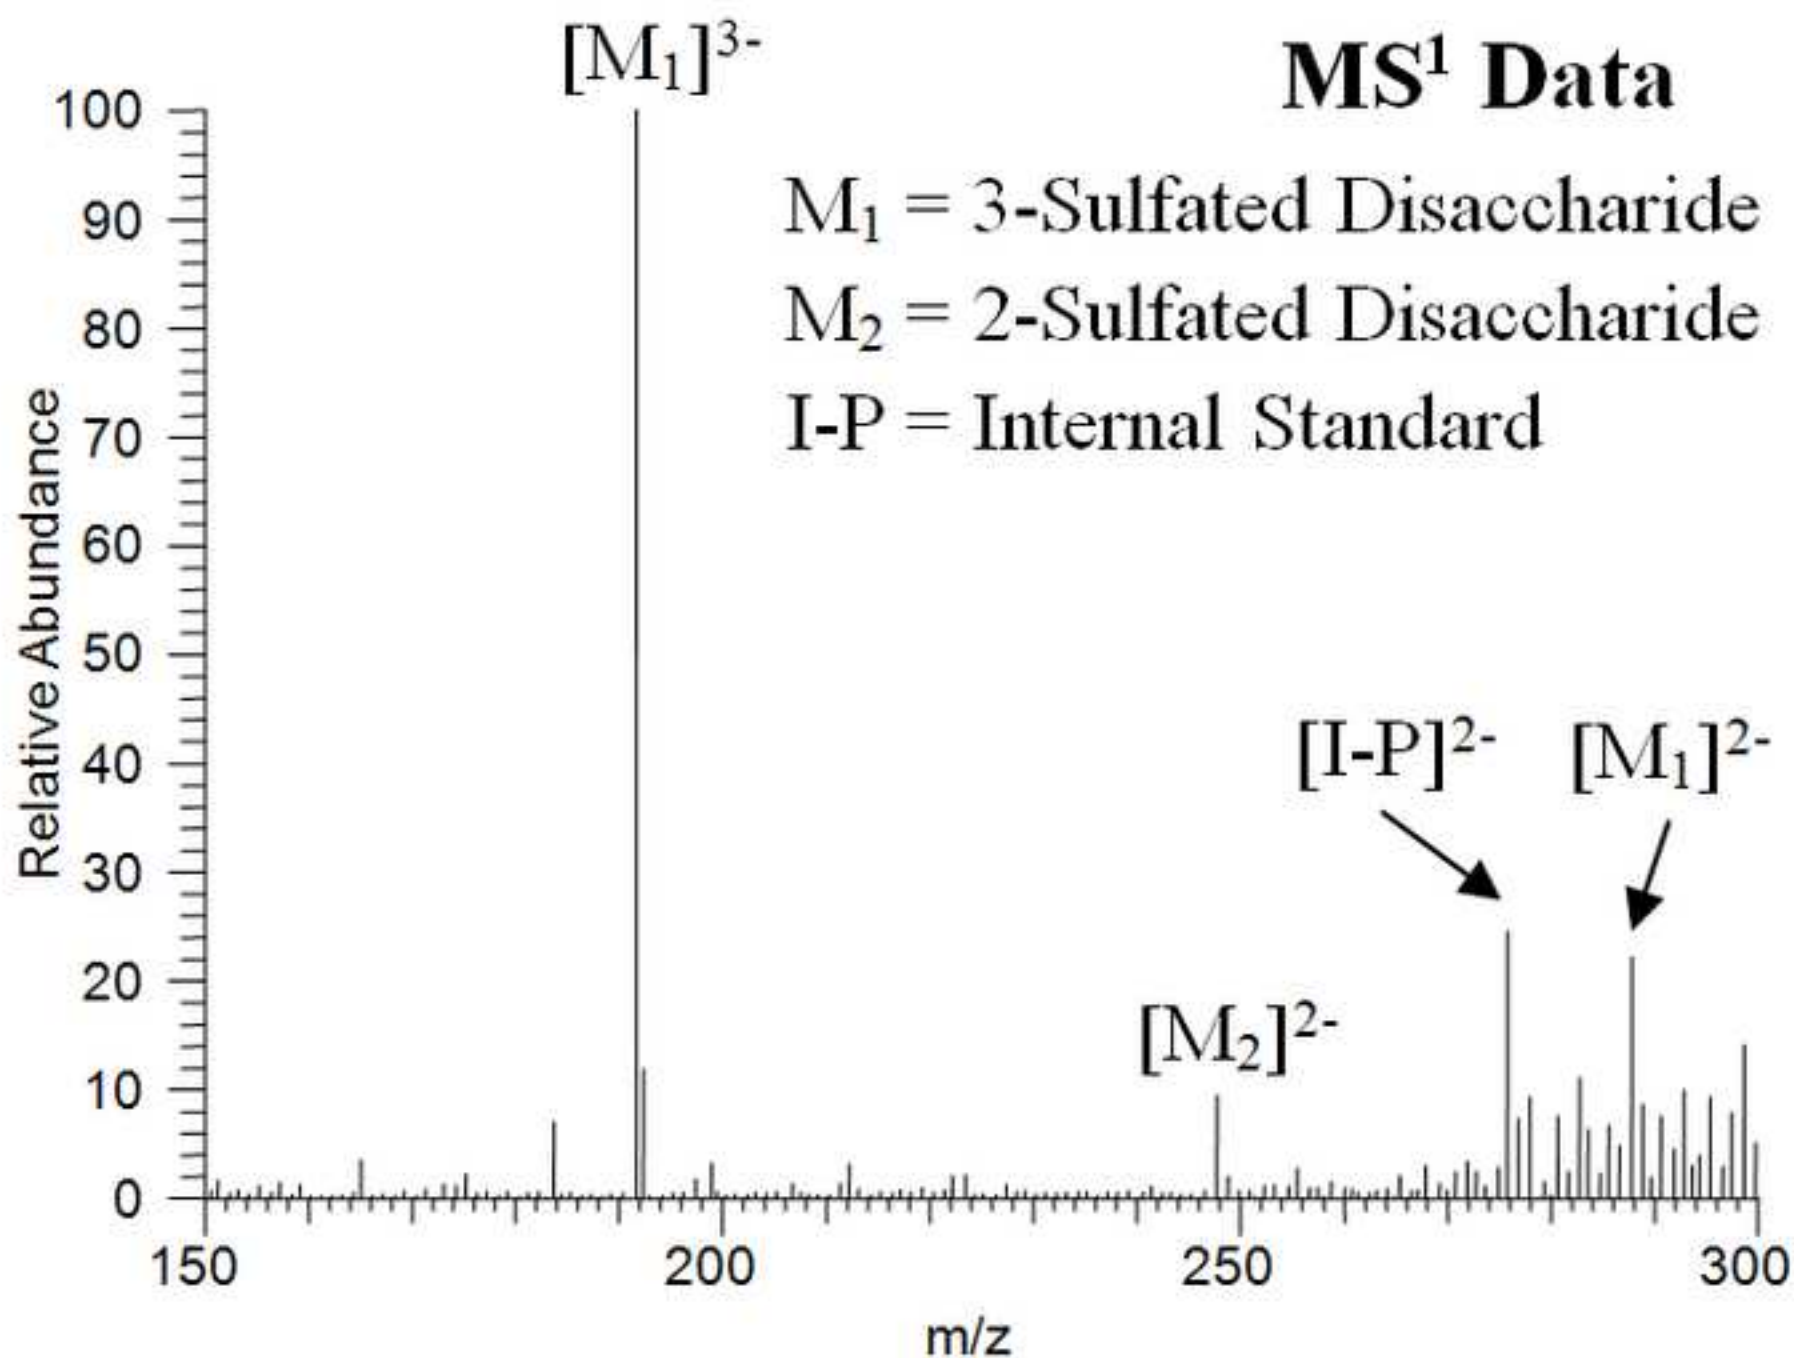

Supplement: NIHMS107559-supplement-01.pdf [file NIHMS107559-supplement-01.pdf]
